# Supplementary material
Source: Springer Nature journal article supplement (https://publikationen.ub.uni-frankfurt.de/opus4/files/35269/13104_2014_3224_MOESM8_ESM.pdf)
Supplement: MOESM8 [file 13104_2014_3224_MOESM8_ESM.pdf]

## Suppl. Figure 2

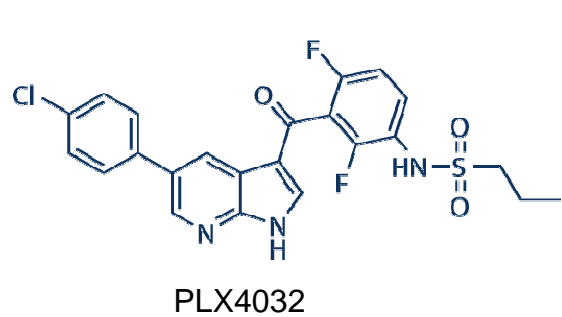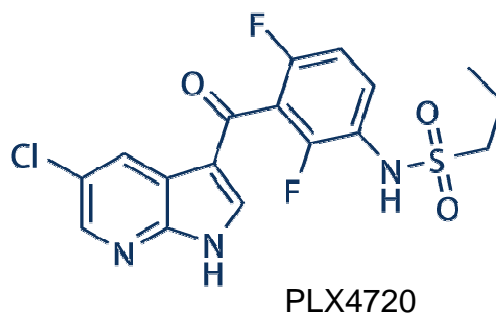

**Suppl. Table 2.** Chemical structures of PLX4032 and PLX4720.
